# Supplementary material
Source: PubMed Central journal article supplement (PMC1538555)
Supplement: 7601247s10.pdf [file 7601247s10.pdf]

**Legend Movie 1:** 360° rotation of a 3D-reconstructed chromaffin cell (from confocal microscope acquisitions) stained with anti-intersectin-1 antibodies revealed by Alexa555-conjugated secondary anti-rabbit antibodies. Each frame represents a clockwise rotation of 5.5° (64 total frames). The rotation is presented at 8 frames per second.
