# Supplementary material
Source: PubMed Central journal article supplement (PMC1538555)

**A**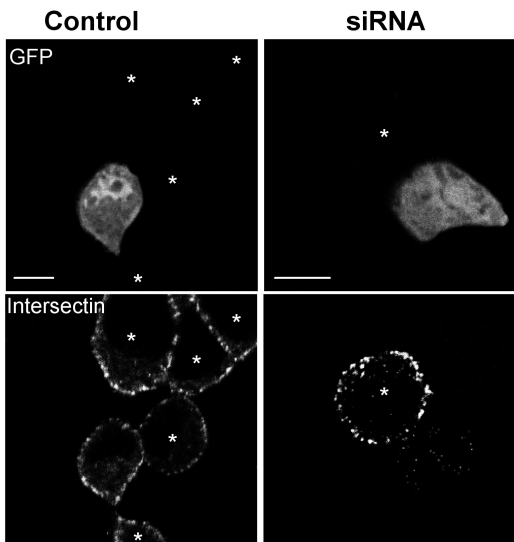**B**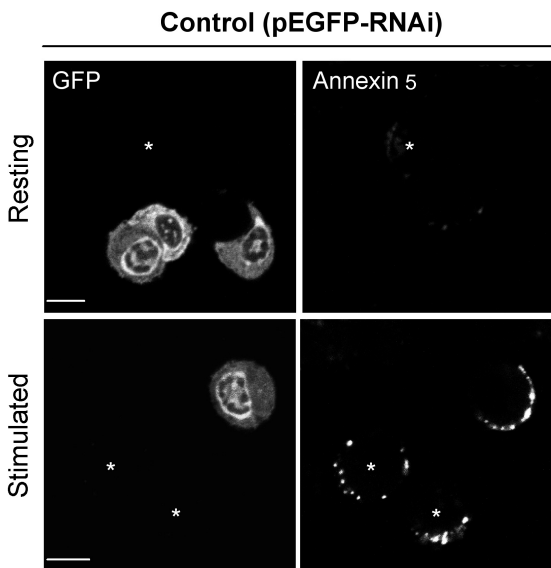

Supplement: 7601247s5.pdf [file 7601247s5.pdf]
